# Supplementary material
Source: PubMed Central journal article supplement (PMC2898359)

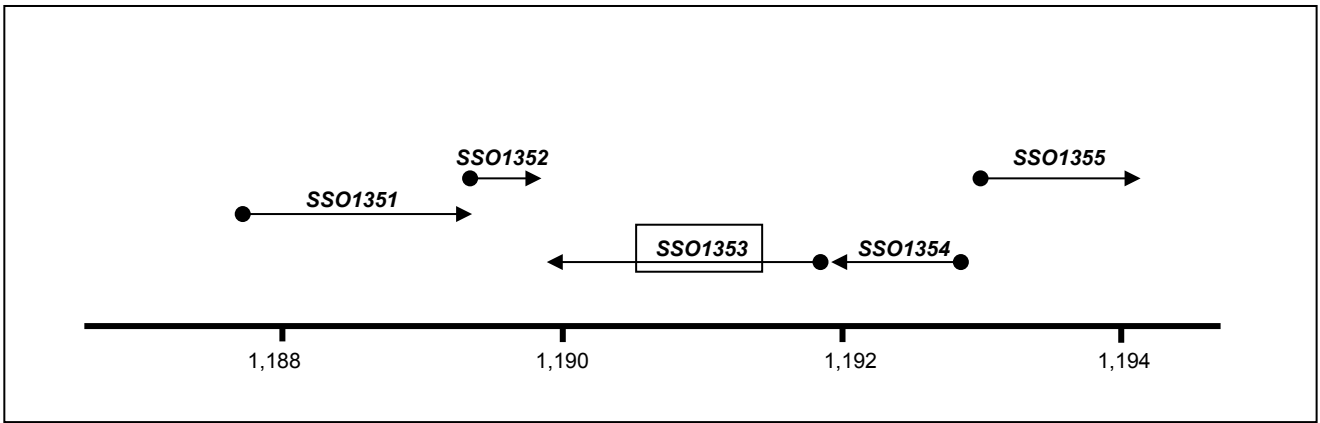

Figure S1

Supplement: supp_M109.086470_FigS1.pdf [file supp_M109.086470_FigS1.pdf]

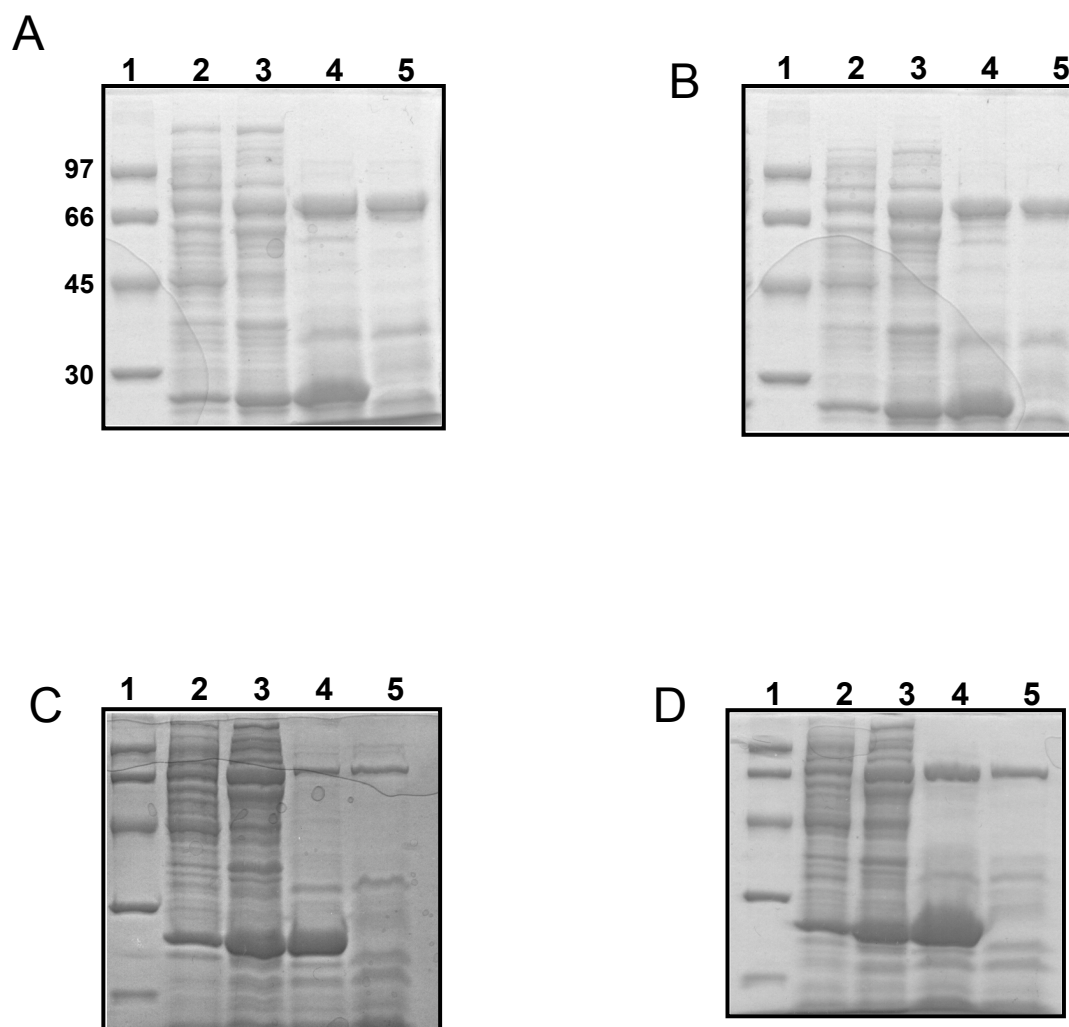

Figure S4

Supplement: supp_M109.086470_FigS4.pdf [file supp_M109.086470_FigS4.pdf]

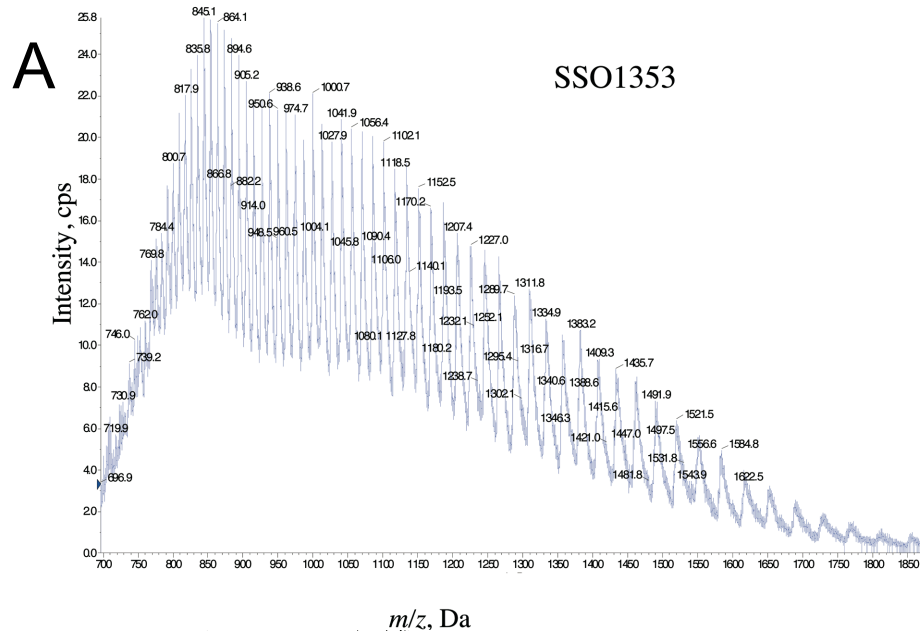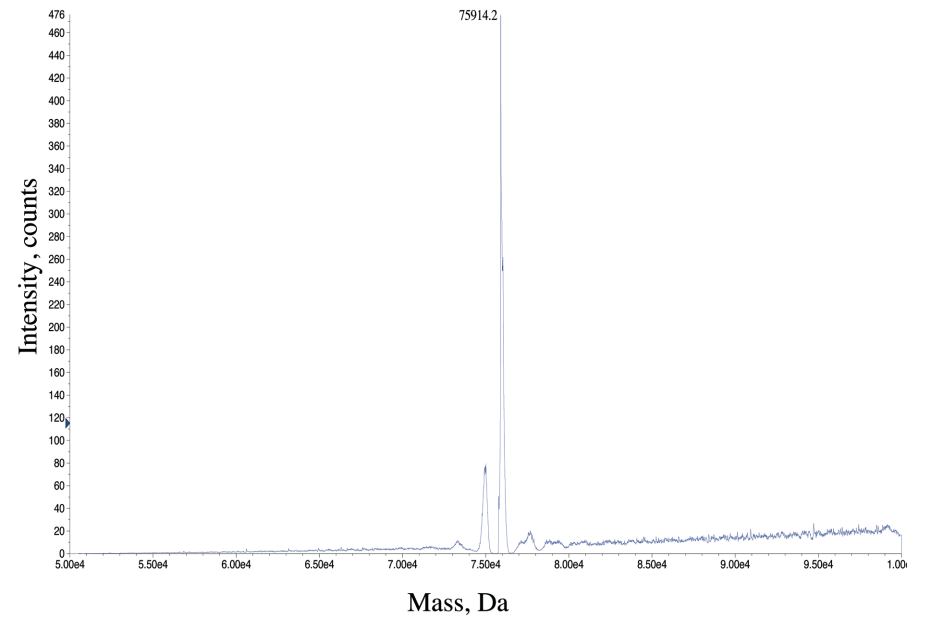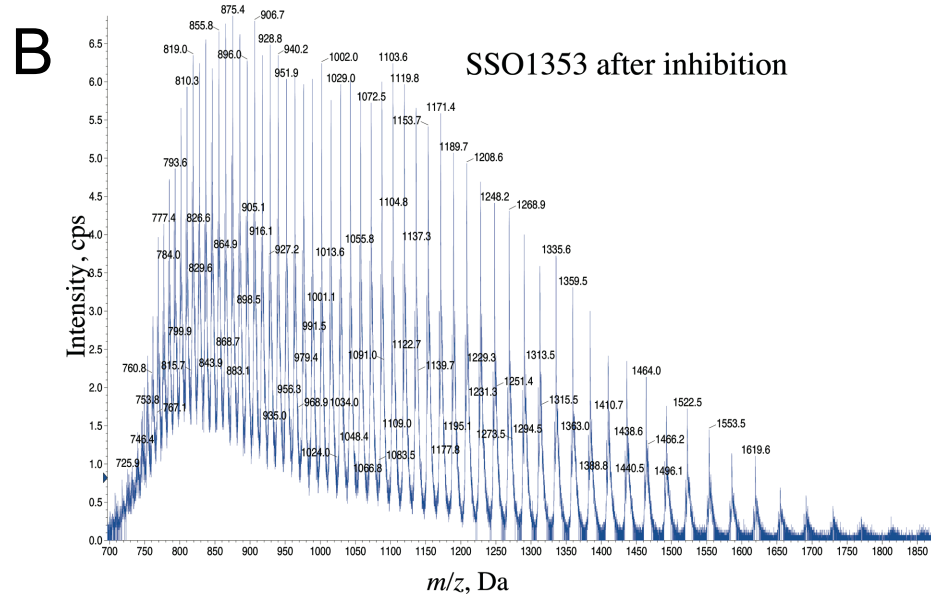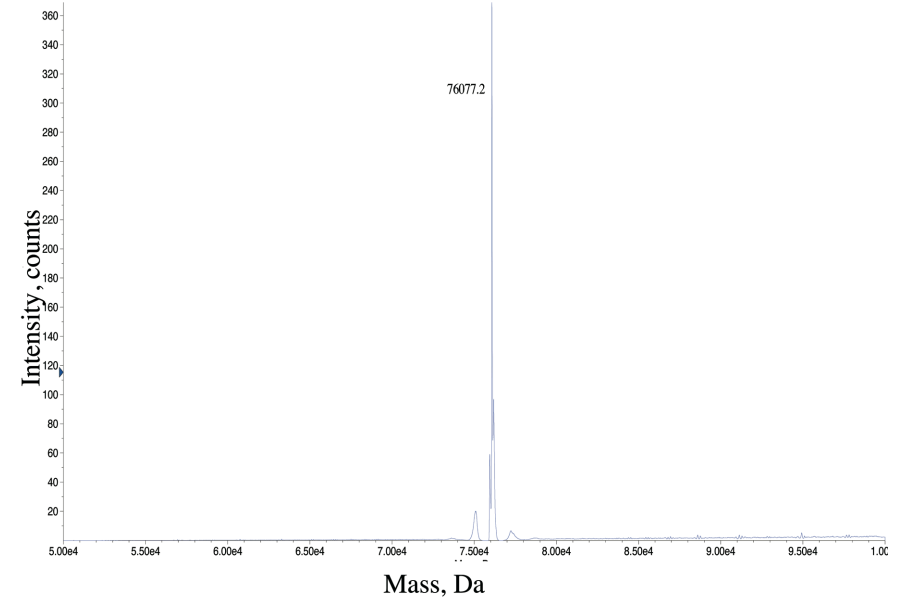

Figure S5

Supplement: supp_M109.086470_FigS5.pdf [file supp_M109.086470_FigS5.pdf]
